# Supplementary material
Source: PubMed Central journal article supplement (PMC2902130)
Supplement: blood-2009-05-221382_2.pdf [file blood-2009-05-221382_2.pdf]

| Characteristic                                   | ARIC                                                                                                                                                                                      | FHS<br>Offspring, Gen 3                                                                                                                                       | MONICA/KORA                                                                                                               |
|--------------------------------------------------|-------------------------------------------------------------------------------------------------------------------------------------------------------------------------------------------|---------------------------------------------------------------------------------------------------------------------------------------------------------------|---------------------------------------------------------------------------------------------------------------------------|
| Study Design reference                           | <sup>1</sup>                                                                                                                                                                              | <sup>3,4,8</sup>                                                                                                                                              | <sup>5-7</sup>                                                                                                            |
| LADS                                             | <a href="http://www.nhlbi.nih.gov/resources/deca/descriptions/aric.htm">http://www.nhlbi.nih.gov/resources/deca/descriptions/aric.htm</a>                                                 | <a href="http://www.nhlbi.nih.gov/resources/deca/descriptions/framoff.htm">http://www.nhlbi.nih.gov/resources/deca/descriptions/framoff.htm</a>               |                                                                                                                           |
| Genetics web                                     | --                                                                                                                                                                                        | <a href="http://www.ncbi.nlm.nih.gov/projects/gap/cgi-bin/study.cgi?id=phs000007">http://www.ncbi.nlm.nih.gov/projects/gap/cgi-bin/study.cgi?id=phs000007</a> | <a href="http://epi.helmholtz-muenchen.de/kora-gen/index_e.php">http://epi.helmholtz-muenchen.de/kora-gen/index_e.php</a> |
| Website                                          | <a href="http://www.csc.unc.edu/aric/">http://www.csc.unc.edu/aric/</a>                                                                                                                   | <a href="http://www.framinghamheartstudy.org/ab-out/index.html">http://www.framinghamheartstudy.org/ab-out/index.html</a>                                     | <a href="http://www.helmholtz-muenchen.de/kora/en/index.html">http://www.helmholtz-muenchen.de/kora/en/index.html</a>     |
| GWAS reference                                   | <sup>9</sup>                                                                                                                                                                              | <sup>9,10</sup>                                                                                                                                               | --                                                                                                                        |
| Genotyping                                       |                                                                                                                                                                                           |                                                                                                                                                               |                                                                                                                           |
| Genotyping platforms, SNP panel                  | Affymetrix 6.0                                                                                                                                                                            | Affymetrix 500K, MIPS 50K                                                                                                                                     | Affymetrix 500K                                                                                                           |
| Genotyping center                                | Broad Institute of Harvard and Massachusetts Institute of Technology                                                                                                                      | Affymetrix                                                                                                                                                    | Affymetrix                                                                                                                |
| Genotyping calling algorithm                     | Bird Seed                                                                                                                                                                                 | BRLMM                                                                                                                                                         | BRLMM                                                                                                                     |
| QC filters on individual level                   | 1st degree relatives: 297<br>Discordant with previous genotyping: 123<br>Genetic outliers (based on average IBS and Eigenstrat run if PC>8SD): 322<br>Gen. sex did not match phen sex: 40 | Call rate, heterozygosity rate, Mendelian errors                                                                                                              | Gender discordance, error in chip comparison                                                                              |
| Call rate (filter / N individuals excluded)      | 95%/none                                                                                                                                                                                  | 97%/97                                                                                                                                                        | 93% / 153                                                                                                                 |
| Heterozygosity (filter / N individuals excluded) | --                                                                                                                                                                                        | 5 SD from mean (<25.758% or >29.958%)/15                                                                                                                      | --                                                                                                                        |
| Exclusion on race/ethnicity                      | --                                                                                                                                                                                        | none                                                                                                                                                          | --                                                                                                                        |
| Other exclusions                                 | --                                                                                                                                                                                        | >1000 Mendelian errors/1                                                                                                                                      | --                                                                                                                        |
| Individuals for analysis                         | 8861                                                                                                                                                                                      | 6771                                                                                                                                                          | 1644                                                                                                                      |
| QC filters on SNP level                          |                                                                                                                                                                                           |                                                                                                                                                               |                                                                                                                           |
| Test for HWE                                     | Exact HWE test (implemented in Plink)                                                                                                                                                     | exact HWE test (implemented in R) <sup>11</sup>                                                                                                               | exact HWE test (implemented in R) <sup>11</sup>                                                                           |
| MAF (filter / N SNPs excluded)                   | 0% / 74                                                                                                                                                                                   | 1% / 68,953                                                                                                                                                   | 5% / 109,681                                                                                                              |
| HWE (filter / N SNPs excluded)                   | 10 <sup>-6</sup> (only for MAF >0.05)/21220                                                                                                                                               | 10 <sup>-6</sup> / 21,002                                                                                                                                     | 10 <sup>-6</sup> / 21,752                                                                                                 |
| Call rate (filter / N SNPs excluded)             | 90%/26274                                                                                                                                                                                 | 95% / 23,312                                                                                                                                                  | 95% / 49,325                                                                                                              |

| Characteristic                                                                | ARIC                                                                                                                                        | FHS<br>Offspring, Gen 3                                                                                                                                                                                                                                                     | MONICA/KORA                                                                                                                                                                                            |
|-------------------------------------------------------------------------------|---------------------------------------------------------------------------------------------------------------------------------------------|-----------------------------------------------------------------------------------------------------------------------------------------------------------------------------------------------------------------------------------------------------------------------------|--------------------------------------------------------------------------------------------------------------------------------------------------------------------------------------------------------|
| Other (filter / N SNPs excluded)                                              | Difference between two data freezes: 21395*                                                                                                 | --                                                                                                                                                                                                                                                                          | --                                                                                                                                                                                                     |
| N SNPs for imputation                                                         | 589,253                                                                                                                                     | 378,163                                                                                                                                                                                                                                                                     | 380,407                                                                                                                                                                                                |
| Imputation                                                                    |                                                                                                                                             |                                                                                                                                                                                                                                                                             |                                                                                                                                                                                                        |
| Imputation software                                                           | Mach1 v1.0.1.5<br><a href="http://www.sph.umich.edu/csg/abecasis/MaCH/index.html">http://www.sph.umich.edu/csg/abecasis/MaCH/index.html</a> | Mach1 v1.0.1.5<br><a href="http://www.sph.umich.edu/csg/abecasis/MaCH/index.html">http://www.sph.umich.edu/csg/abecasis/MaCH/index.html</a>                                                                                                                                 | Mach1 v1.0.1.5<br><a href="http://www.sph.umich.edu/csg/abecasis/MaCH/index.html">http://www.sph.umich.edu/csg/abecasis/MaCH/index.html</a>                                                            |
| Imputation quality metrics                                                    | -                                                                                                                                           | $r^2_{\text{hat}} \geq 0.3$                                                                                                                                                                                                                                                 | --                                                                                                                                                                                                     |
| Other SNP quality filters                                                     | -                                                                                                                                           | MAF $\geq 1\%$                                                                                                                                                                                                                                                              | --                                                                                                                                                                                                     |
| N imputed SNPs for analysis                                                   | 2,516,204                                                                                                                                   | 2,540,223                                                                                                                                                                                                                                                                   | 2,557,252                                                                                                                                                                                              |
| Phenotypes                                                                    |                                                                                                                                             |                                                                                                                                                                                                                                                                             |                                                                                                                                                                                                        |
| Individuals for analysis, N                                                   | 729                                                                                                                                         | 6771                                                                                                                                                                                                                                                                        | 1,625                                                                                                                                                                                                  |
| Trait transformation                                                          | Log-transformed                                                                                                                             | Log-transformed (unstandardized residuals)                                                                                                                                                                                                                                  | Log-transformed (unstandardized)                                                                                                                                                                       |
| Cohort-specific adjustments                                                   | Age, sex, case status                                                                                                                       | Cohort –specific residuals<br>Model 1: age, sex<br>Model 2: age, sex, smoking, SBP, DBP, HTN treatment, BMI, waist circumference, total/HDL cholesterol, triglyceride, lipid lowering medication, glucose, diabetes, aspirin, hormone replacement therapy and prevalent CVD | age, sex, smoking, SBP, DBP, HTN treatment, BMI, waist circumference, total/HDL cholesterol, triglyceride, lipid lowering medication, diabetes, aspirin, hormone replacement therapy and prevalent CVD |
| Analysis method                                                               | Linear regression                                                                                                                           | Linear mixed effect models to account for family structure                                                                                                                                                                                                                  | Linear regression                                                                                                                                                                                      |
| Analysis software                                                             | Probabel<br>( <a href="http://mga.bionet.nsc.ru/~yurii/ABEL/">http://mga.bionet.nsc.ru/~yurii/ABEL/</a> ) <sup>12</sup>                     | SAS version 8.1 (Cary, North Carolina, <a href="http://www.sas.com/presscenter/guidelines.html">http://www.sas.com/presscenter/guidelines.html</a> ) <sup>13</sup><br>R version 2.6.1 ( <a href="http://www.r-project.org">www.r-project.org</a> ) <sup>14</sup>            | SAS version 9.1 (Cary, North Carolina, <a href="http://www.sas.com/presscenter/guidelines.html">http://www.sas.com/presscenter/guidelines.html</a> )                                                   |
| Genomic control ( $\lambda$ ), age- and sex-adjusted (multivariable-adjusted) | 0.999 (0.999)                                                                                                                               | 1.017 (1.011)                                                                                                                                                                                                                                                               | Plasma 0.977 (0.977)<br>Serum 1.016 (1.016)                                                                                                                                                            |

\*Genotyping was performed in two steps (two sets of individuals). HWE indicates Hardy-Weinberg equilibrium. LADS indicates limited access data set.
