# Supplementary material
Source: PubMed Central journal article supplement (PMC2902130)
Supplement: blood-2009-05-221382_4.pdf [file blood-2009-05-221382_4.pdf]

|        | <b>[MCP-1], pg/ml</b> |                      |                      |             |                      |                      |
|--------|-----------------------|----------------------|----------------------|-------------|----------------------|----------------------|
|        | <b>Serum</b>          |                      |                      | <b>EDTA</b> |                      |                      |
|        | <b>mean</b>           | <b>measurement 1</b> | <b>measurement 2</b> | <b>mean</b> | <b>measurement 1</b> | <b>measurement 2</b> |
| N      | 101                   | 51                   | 51                   | 101         | 51                   | 51                   |
| mean   | 350.1                 | 345.5                | 350.4                | 156.6       | 157.8                | 158.7                |
| median | 323                   | 313                  | 319                  | 148         | 145                  | 143                  |
| SD     | 116.0                 | 120.9                | 122.6                | 47.1        | 49.5                 | 48.6                 |
| 75%    | 413                   |                      |                      | 186         |                      |                      |
| 25%    | 278                   |                      |                      | 123         |                      |                      |
| Min    | 177                   |                      |                      | 74          |                      |                      |
| Max    | 791                   |                      |                      | 291         |                      |                      |

Measurements 1 and 2 are replicates in 51 individuals of which the average values are reported.
