# Supplementary material
Source: PubMed Central journal article supplement (PMC2902130)
Supplement: blood-2009-05-221382_5.pdf [file blood-2009-05-221382_5.pdf]

| Sample                             | MCP-1, pg/mL    |                 |
|------------------------------------|-----------------|-----------------|
|                                    | Before clotting | After clotting  |
| Donor 1 EDTA                       | 168.0           | 156.6           |
| Donor 2 EDTA                       | 176.3           | 156.6           |
| Donor 1 citrate                    | 180.1           | 175.9           |
| Donor 2 citrate                    | 178.2           | 166.3           |
| Mean, n=4                          | 175.7           | 163.9           |
|                                    | <b>(-) PBMC</b> | <b>(+) PBMC</b> |
| Donor 1 citrate plasma-based serum | 222.6           | 166.2           |
| Donor 2 citrate plasma-based serum | 158.9           | 110.6           |
| Donor 3 citrate plasma-based serum | 162.2           | 102.7           |
| Donor 4 citrate plasma-based serum | 180.6           | 123.4           |
| Mean, n=4                          | 181.1           | 125.7           |

Note: the presence of platelets or PBMCs during the clotting of plasma resulted in ~7% and ~30% decreased MCP-1 values; at this time we are uncertain of the cause of this decrease but interpret these data as inconsistent with the concept that these cells contribute MCP-1 to serum during clotting.
