# Supplementary material
Source: PubMed Central journal article supplement (PMC2902130)
Supplement: blood-2009-05-221382_6.pdf [file blood-2009-05-221382_6.pdf]

| <b>Sample</b>         | <b>[MCP-1]<sub>EDTA plasma</sub>, pg/mL</b> |
|-----------------------|---------------------------------------------|
| Bivalirudin, baseline | 168.9 (20.3)                                |
| Bivalirudin, 1 hour   | 171.8 (19.8)                                |
| Heparin, baseline     | 171.2 (37.6)                                |
| Heparin, 1 hour       | 167.2 (37.8)                                |

Provided are mean (standard error of the mean) for 6 patients in each arm.
